# Supplementary material for: Unmet Health Needs among Young Adults with Cerebral Palsy in Ireland: A Cross-Sectional Study
Source: MDPI journal article supplement (doi:10.3390/jcm11164847), 2022-08-18
Supplement: s1 [file s1]

**Table S1 Associations between intellectual disability, ambulatory status, discharge status and unmet need for speech, epilepsy, equipment, mobility and control of movement**

|                                     | Speech (n=25)                      |              | Epilepsy (n=14)      |          | Equipment (n=51)     |          | Mobility (n=56)                    |              | Control of movement (n=48) |          |
|-------------------------------------|------------------------------------|--------------|----------------------|----------|----------------------|----------|------------------------------------|--------------|----------------------------|----------|
|                                     | $\beta$ (95% CI)                   | <i>p</i>     | $\beta$ (95% CI)     | <i>p</i> | $\beta$ (95% CI)     | <i>p</i> | $\beta$ (95% CI)                   | <i>p</i>     | $\beta$ (95% CI)           | <i>p</i> |
| <i>Unadjusted analyses</i>          |                                    |              |                      |          |                      |          |                                    |              |                            |          |
| <b>Intellectual disability</b>      | 0.80<br>(0.16, 4.12)               | 0.790        | 1.88<br>(0.20, 17.3) | 0.579    | 1.40<br>(0.43, 4.51) | 0.573    | <b>3.64</b><br><b>(1.10, 12.0)</b> | <b>0.034</b> | 1.00<br>(0.29, 3.45)       | 1.000    |
| <b>GMFCS level IV-V<sup>a</sup></b> | <b>6.00</b><br><b>(1.00, 35.9)</b> | <b>0.050</b> | 4.50<br>(0.34, 60.2) | 0.256    | 1.82<br>(0.58, 5.70) | 0.303    | 2.75<br>(0.90, 8.40)               | 0.076        | 1.80<br>(0.55, 5.89)       | 0.334    |
| <b>Discharged</b>                   | 1.56<br>(0.28, 8.53)               | 0.611        | 1.00<br>(0.12, 8.31) | 1.000    | 0.63<br>(0.20, 1.97) | 0.428    | 1.78<br>(0.60, 5.30)               | 0.302        | 1.75<br>(0.52, 5.89)       | 0.366    |
| <i>Adjusted analysis</i>            |                                    |              |                      |          |                      |          |                                    |              |                            |          |
| <b>Intellectual disability</b>      | Not calculated                     |              | Not calculated       |          | 0.97<br>(0.25, 3.77) | 0.967    | 3.08<br>(0.78-12.2)                | 0.108        | 0.75<br>(0.17, 3.37)       | 0.711    |
| <b>GMFCS level IV-V<sup>a</sup></b> | Not calculated                     |              | Not calculated       |          | 2.08<br>(0.54, 8.01) | 0.287    | 1.52<br>(0.40, 5.68)               | 0.537        | 1.90<br>(0.45, 8.01)       | 0.381    |
| <b>Discharged</b>                   | Not calculated                     |              | Not calculated       |          | 0.55<br>(0.17, 1.80) | 0.319    | 1.73<br>(0.52, 5.76)               | 0.368        | 1.49<br>(0.41, 5.42)       | 0.547    |

<sup>a</sup>Reference: levels I-III

Table S2 Associations between intellectual disability, ambulatory status, discharge status and unmet need for bone or joint problems, positioning, curvature of back, eyesight and pain.

|                                     | Bone or joint problems<br>(n=39) |          | Positioning (n=37)   |          | Curvature of back (n=30) |          | Eyesight (n=38)                    |              | Pain (n=34)          |          |
|-------------------------------------|----------------------------------|----------|----------------------|----------|--------------------------|----------|------------------------------------|--------------|----------------------|----------|
|                                     | $\beta$ (95% CI)                 | <i>p</i> | $\beta$ (95% CI)     | <i>p</i> | $\beta$ (95% CI)         | <i>p</i> | $\beta$ (95% CI)                   | <i>p</i>     | $\beta$ (95% CI)     | <i>p</i> |
| <i>Unadjusted analyses</i>          |                                  |          |                      |          |                          |          |                                    |              |                      |          |
| <b>Intellectual disability</b>      | 1.11<br>(0.30, 4.17)             | 0.876    | 3.31<br>(0.76, 14.4) | 0.111    | 1.67<br>(0.35, 8.04)     | 0.525    | 1.42<br>(0.34, 5.87)               | 0.631        | 0.94<br>(0.14, 6.54) | 0.954    |
| <b>GMFCS level IV-V<sup>a</sup></b> | 0.74<br>(0.20, 2.70)             | 0.649    | 7.33<br>(0.81, 66.1) | 0.076    | 0.63<br>(0.13, 3.09)     | 0.564    | <b>12.9</b><br><b>(2.22, 74.5)</b> | <b>0.004</b> | 0.54<br>(0.08, 3.74) | 0.534    |
| <b>Discharged</b>                   | 1.69<br>(0.44, 6.47)             | 0.442    | 1.20<br>(0.29, 4.94) | 0.800    | 3.18<br>(0.53, 19.1)     | 0.205    | 2.13<br>(0.46, 9.84)               | 0.331        | 0.62<br>(0.09, 4.29) | 0.630    |
| <i>Adjusted analysis</i>            |                                  |          |                      |          |                          |          |                                    |              |                      |          |
| <b>Intellectual disability</b>      | 1.49<br>(0.32, 6.93)             | 0.610    | 2.14<br>(0.44, 10.5) | 0.349    | 3.11<br>(0.50, 19.18)    | 0.222    | Not calculable                     |              | 1.46<br>(0.12, 17.6) | 0.767    |
| <b>GMFCS level IV-V<sup>a</sup></b> | 0.53<br>(0.11, 2.48)             | 0.418    | 5.65<br>(0.55, 57.7) | 0.144    | 0.23<br>(0.03, 1.81)     | 0.162    | Not calculable                     |              | 0.47<br>(0.03, 6.53) | 0.576    |
| <b>Discharged</b>                   | 1.97<br>(0.48, 8.06)             | 0.345    | 0.94<br>(0.19, 4.49) | 0.934    | 7.64<br>(0.82, 71.4)     | 0.075    | Not calculable                     |              | 0.81<br>(0.10, 6.79) | 0.842    |

<sup>a</sup>Reference: levels I-III
